# Supplementary material for: CMV viral load kinetics as surrogate endpoints after allogeneic transplantation
Source: JCI journal article supplement (doi:10.1172/jci133960), 2020-09-24
Supplement: sd2 [file 2]

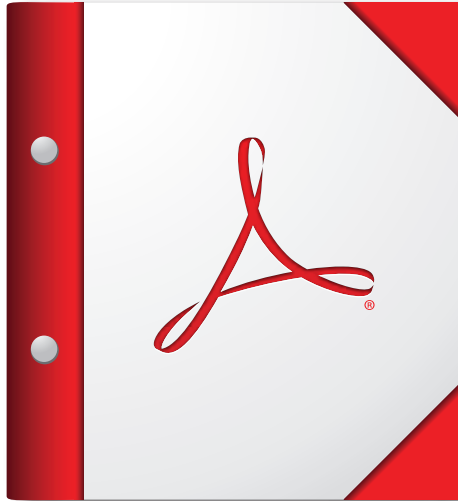

**For the best experience, open this PDF portfolio in  
Acrobat X or Adobe Reader X, or later.**

**Get Adobe Reader Now!**
